# Supplementary material for: Nutritional support and prevention of post-intensive care syndrome: the Italian SIAARTI survey
Source: Springer Nature journal article supplement (doi:10.1186/s44158-023-00132-4), 2023-11-07
Supplement: MOESM2 [file 26275080]

## **Section 1: Characteristics of the Centre**

1. Region:
2. Structure:
  - a. Hospital;
  - b. University Hospital;
  - c. Private clinic;
  - d. IRCCS.
3. Number of beds in Intensive Care:
4. Total number of beds in the hospital:
5. Type of Resuscitation:
  - a. General;
  - b. Cardiac surgery;
  - c. Neurosurgical;
  - d. Pediatric;
  - e. Other.

## **Section 2: Nutritional Evaluation to the Critically Ill Patient**

6. Is a nutritional risk evaluation performed at the admission in ICU in case of >24 hours?
  - a. Yes;
  - b. No.
7. The prescription of a nutritional program is based on:
  - a. Anamnesis, physical examination of the patient and laboratory tests;
  - b. I prefer to evaluate only laboratory tests.
  - c. Other

8. What score is used for nutritional risk assessment?
  - a. Nutritional Risk Score, NRS;
  - b. NUTRIC score;
  - c. MUST score;
  - d. No score.
  
9. Is the nutrition assessment performed at patient admission in ICU and, if necessary, drawn up a nutritional program?
  - a. Yes;
  - b. No.
  
10. How are the patient's caloric needs assessed?
  - a. Indirect calorimetry;
  - b. Harris-Benedict formula;
  - c. Faisy equation;
  - d. 25 Kcal/kg;
  - e. Penn State equation.
  
11. Does the caloric intake evaluation take into account a possible contribution of propofol, glucose, citrate, and lactate?
  - a. Yes;
  - b. Not always;
  - c. I don't have time to make such an accurate assessment;
  - d. Never.
  
12. How often is the evaluation of the nitrogen balance carried out?
  - a. Once a week;
  - b. Twice a week;
  - c. It is not carried out.

13. Is a personalized nutritional evaluation performed by organ failures (lungs, kidney, liver)?
- Yes;
  - No.
14. Who is the nutritional leader in ICU?
- An intensive care Physician;
  - A nutritionist;
  - Other professional figure;
  - None.

### **Section 3: Nutritional Management to the Critical Patient**

15. Is a nutritional protocol used in your intensive care unit?
- Yes;
  - No.
16. When is the administration of nutritional therapy started in your intensive care unit?
- Within the first 2 days of admission;
  - Within the first 5 days of admission;
  - After the first week after hospitalization;
  - Upon admission to intensive care.
17. What type of nutrition is chosen in the first days of ICU?
- Enteral nutrition (EN);
  - Total parenteral nutrition (TPN);
  - EN + SPN;
  - None, only electrolyte solution associated with carbohydrates.
18. When is TPN provided in your intensive care unit?
- As a first-choice (TPN only);

- b. As supplemental nutrition in the first 24-48 hours after admission (EN+SPN);
  - c. As supplemental nutrition when the caloric-protein intake provided with EN alone is inadequate (intolerance or contraindications);
  - d. Never.
19. Do you think that the prone position, ECMO treatment, muscle relaxant administration represents a contraindication to EN?
- a. Yes;
  - b. No.
20. Do you think that shock, vasopressors is an absolute contraindication to EN?
- a. Yes;
  - b. It is not an absolute contraindication because it depends on the hemodynamic stability of the patient.
21. How is enteral nutritional therapy administered?
- a. Repeated boluses;
  - b. Cyclic (a few hours a day);
  - c. Continue within 24 hours.

#### **Section 4: Nutritional Monitoring to the Critically Ill**

22. Is there a glycemic control protocol in your intensive care unit?
- a. Yes;
  - b. No;
23. If so, is glycemic management performed independently by the nursing staff?
- a. Yes;
  - b. No.
24. How is glycemic control performed?
- a. Blood gas analysis;

- b. Peripheral venous blood sample;
  - c. Central venous blood sample;
  - d. Capillary blood;
25. What is the glycemic target in the critical non-diabetic patient in your intensive care?
- a. <140 mg/dl;
  - b. 140-180 mg/dl;
  - c. >180 mg/dl;
26. What is the frequency of residual gastric monitoring in your intensive care?
- a. Once/day;
  - b. Every 6-8 hours;
  - c. None;
  - d. others.
27. In case of residual gastric volume >300-500 ml, EN is stopped?
- a. Yes;
  - b. No.
28. Is a post pyloric approach provided if EN is not well tolerated?
- a. Yes;
  - b. No.
29. Is enteral nutrition administered equals to EN prescribed?
- a. Yes;
  - b. No.
30. In your intensive care, is ultrasonography used to assess the nutritional state?
- a. Yes, diaphragm only
  - b. Yes, only quadriceps femoris muscle
  - c. Both ultrasonography of the quadriceps femoris muscle and diaphragm

d. No.
